# Supplementary material for: Effects of alkyl chain substitution on the crystal structure of benzothiazole-derived squarylium dyes
Source: Royal Society of Chemistry journal article supplement (doi:10.1039/c4ce01571a), 2014-01-01
Supplement: c4ce01571a1.pdf [file c4ce01571a1.pdf]

*Electronic Supplementary Information for*

## **Effects of Alkyl Chain Substitution on Crystal Structure of Benzothiazole-derived Squarylium Dyes**

Kan Ueji\*, Shuhei Ichimura, Yoshinori Tamaki, and Kazuo Miyamura\*

*Department of Chemistry, Faculty of Science, Tokyo University of Science,*

*1-3 Kagurazaka, Shinjuku, Tokyo 162-8601, Japan*

\*Correspondence Author

Kan Ueji (E-mail: b113702@ed.tus.ac.jp)

Kazuo Miyamura (E-mail: miyamura@rs.kagu.tus.ac.jp)

### ***Outline***

Figure S1-S10. Molecular structure of squarylium dyes illustrated by Ortep-3

Figure S11-S16. Crystal structure of SQ10

Figure S17. Optical waveguide spectra of all single crystals and UV-Vis spectra of solution

Figure S18. ORTEP view of the C31–C40 alkyl chain of SQ10 involving Fourier synthesis peaks

Figure S19. Fingerprint plot in Hirshfeld surface for all derivatives

Figure S20. DSC curves of virgin sample of SQ06-12, 14

Figure S21. DSC curves of SQ16

Table S1. Selected geometry parameters of the hydrogen bond and the S...O interaction

Least-squares planes calculated by SHELX-97

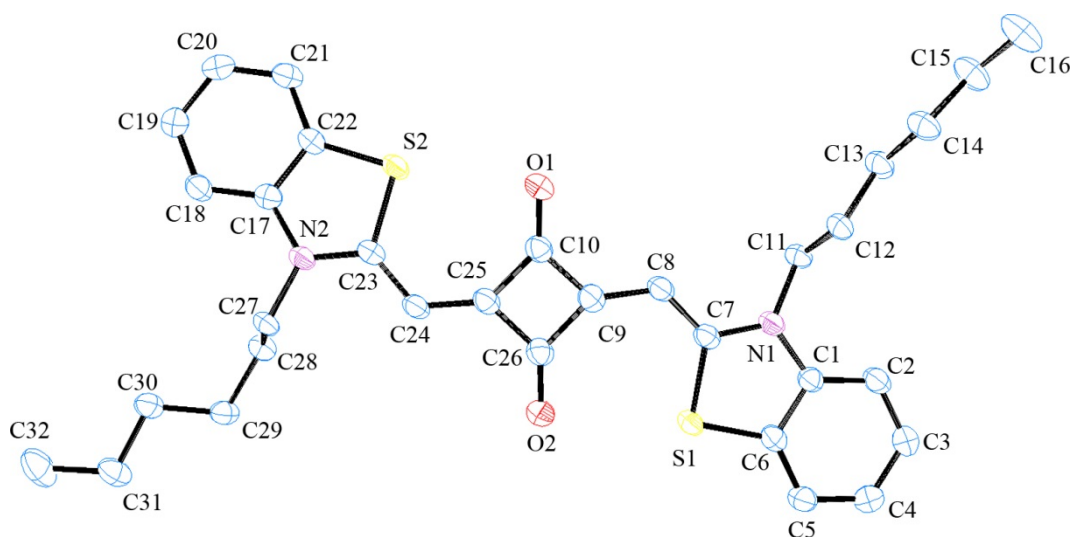

Figure S1. ORTEP view of SQ6 showing 50% probability ellipsoids and the atom-numbering scheme (H atoms were omitted for clarity).

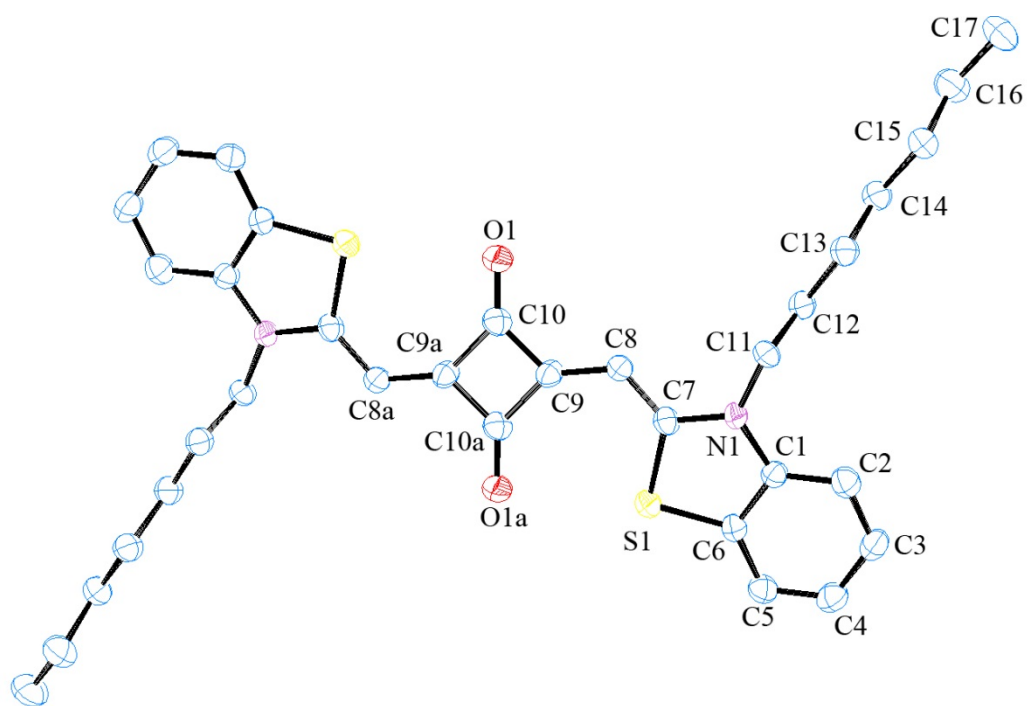

Figure S2. ORTEP view of SQ7 showing 50% probability ellipsoids and the atom-numbering scheme (H atoms were omitted for clarity). Symmetry code;  $a = 2 - x, 1 - y, -z$

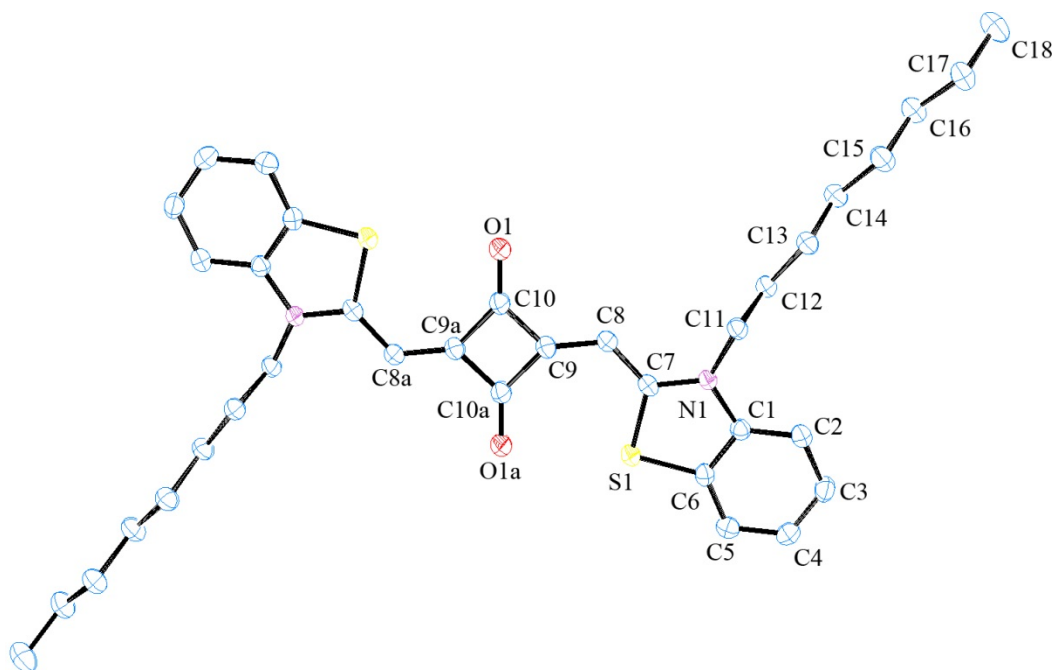

Figure S3. ORTEP view of SQ8 showing 50% probability ellipsoids and the atom-numbering scheme (H atoms were omitted for clarity). Symmetry code;  $a = 2 - x, 1 - y, -z$

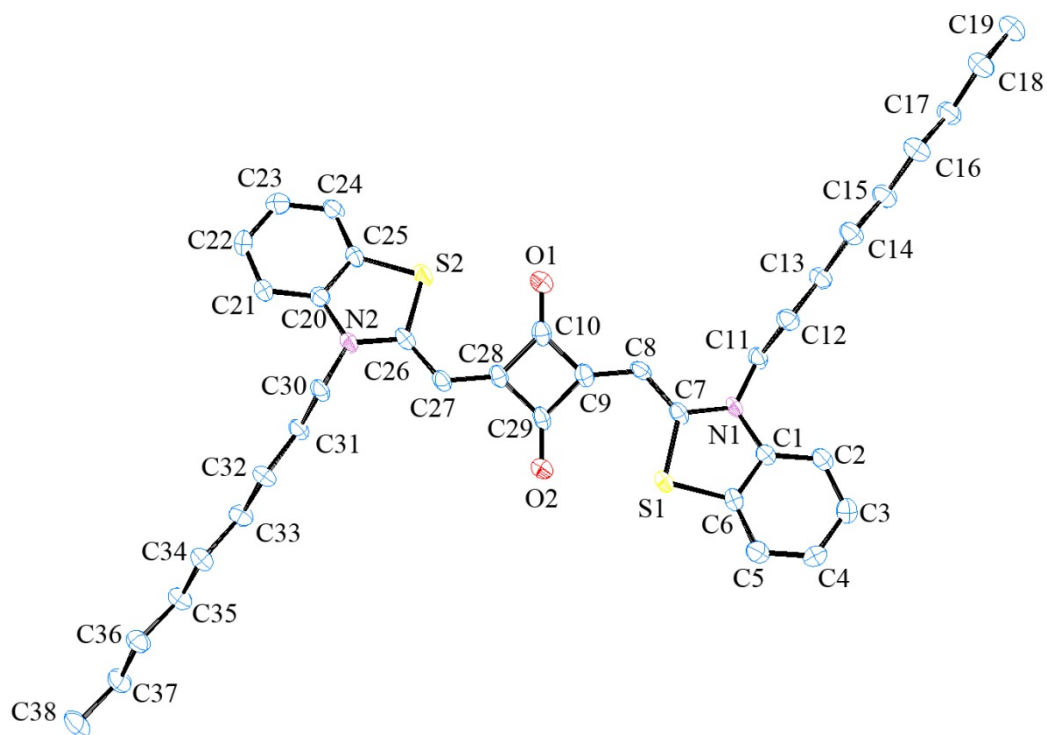

Figure S4. ORTEP view of SQ9 showing 50% probability ellipsoids and the atom-numbering scheme (H atoms were omitted for clarity).

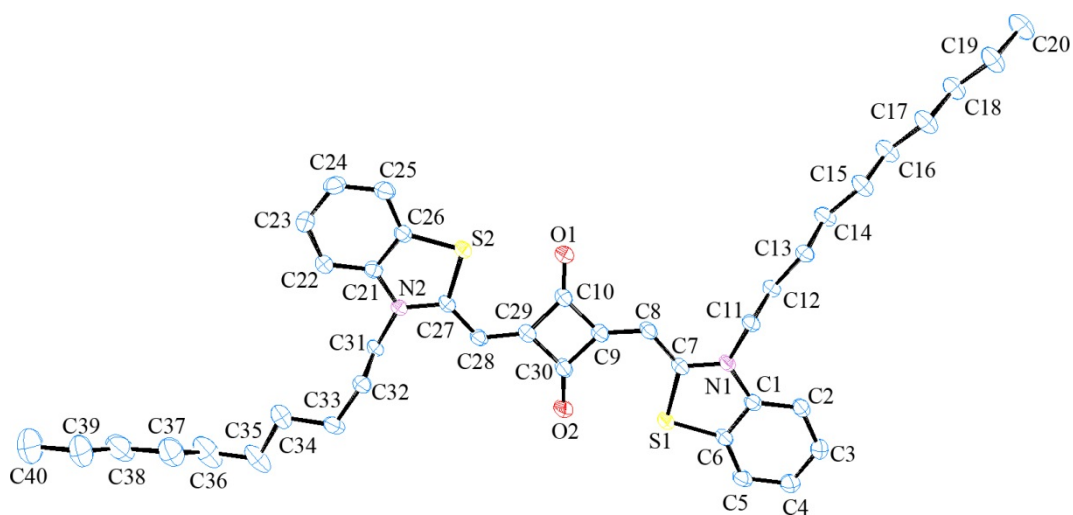

Figure S5. ORTEP view of SQ10 showing 50% probability ellipsoids and the atom-numbering scheme (H atoms were omitted for clarity).

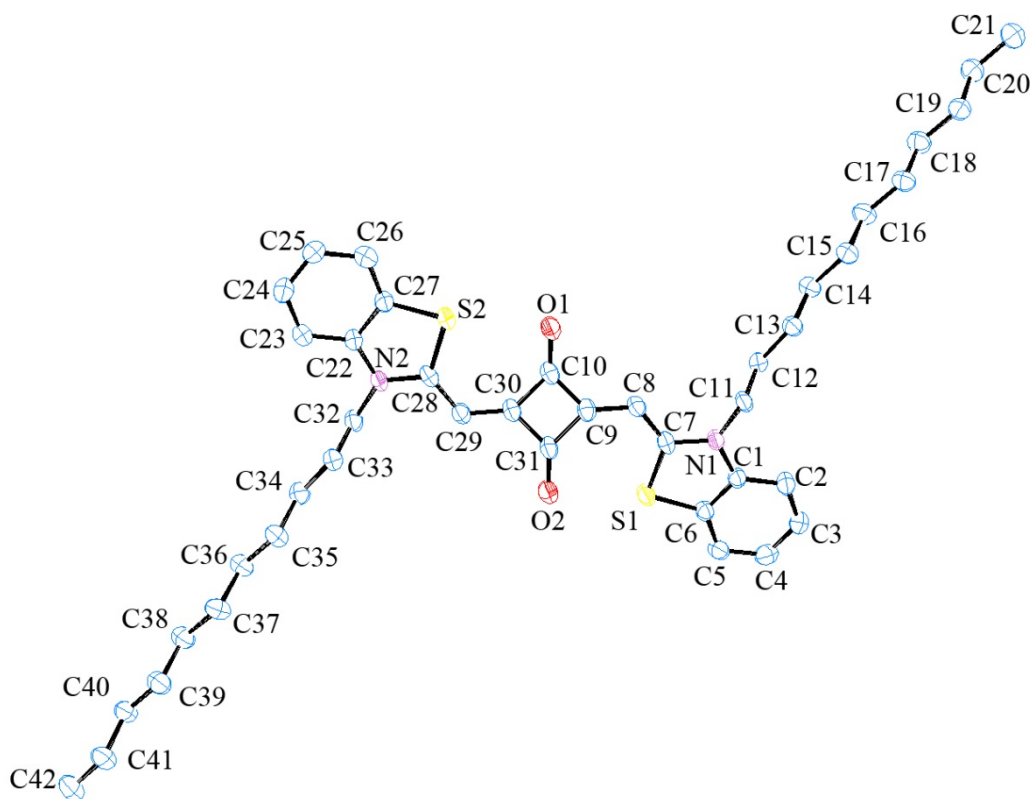

Figure S6. ORTEP view of SQ11 showing 50% probability ellipsoids and the atom-numbering scheme (H atoms were omitted for clarity).

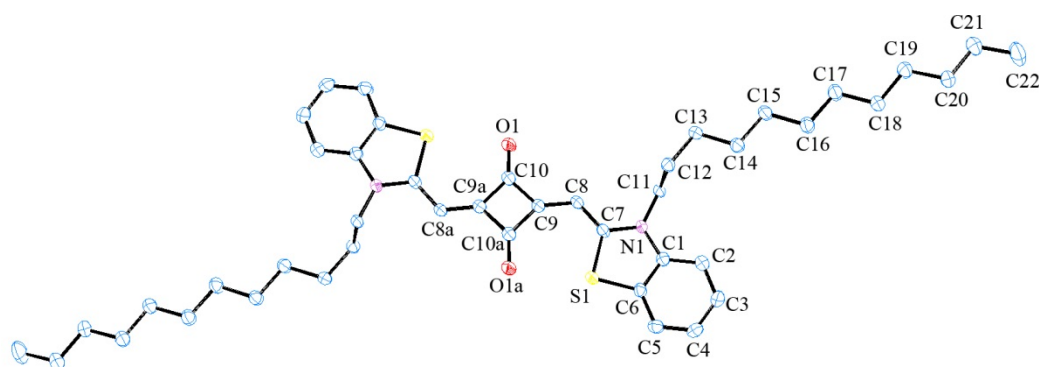

Figure S7. ORTEP view of SQ12 showing 50% probability ellipsoids and the atom-numbering scheme (H atoms were omitted for clarity). Symmetry code;  $a = -1 - x, 3 - y, -z$

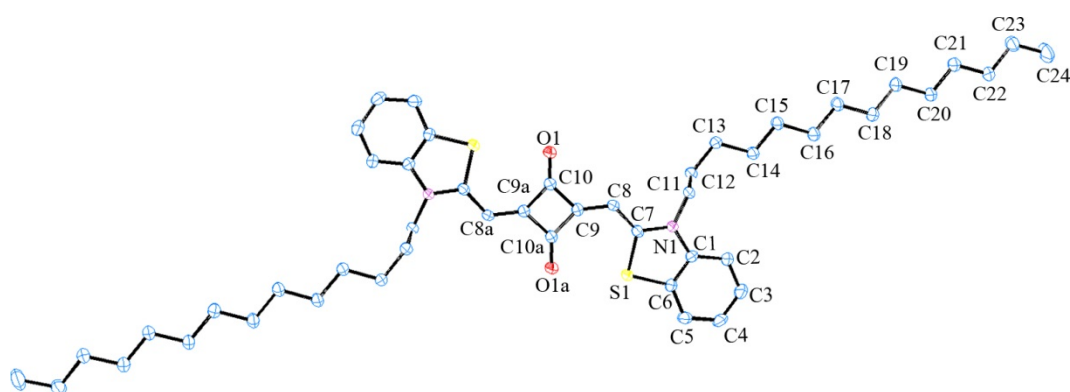

Figure S8. ORTEP view of SQ14 showing 50% probability ellipsoids and the atom-numbering scheme (H atoms were omitted for clarity). Symmetry code;  $a = 3 - x, 3 - y, 1 - z$

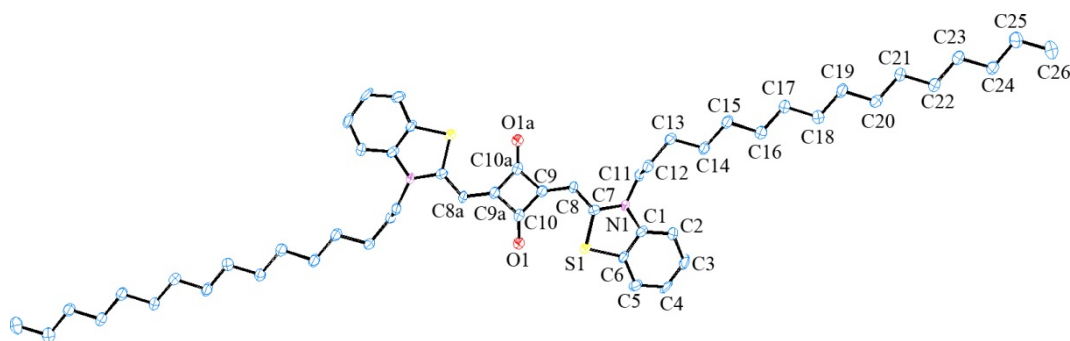

Figure S9. ORTEP view of SQ16 showing 50% probability ellipsoids and the atom-numbering scheme (H atoms were omitted for clarity). Symmetry code;  $a = 4 - x, -1 - y, 1 - z$

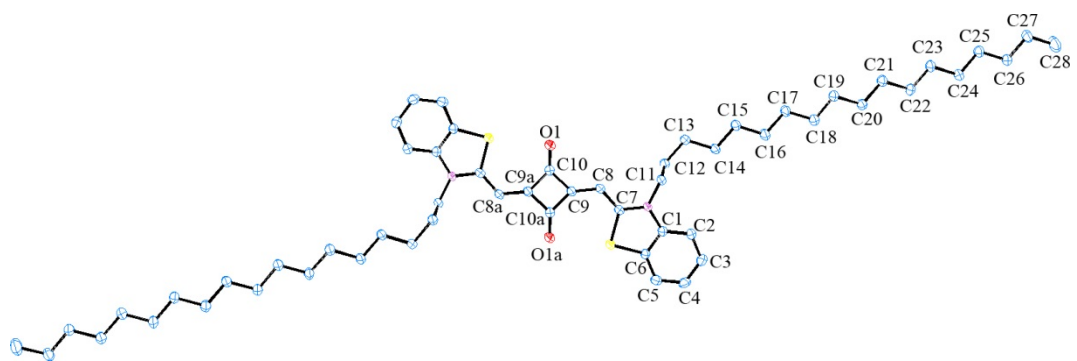

Figure S10. ORTEP view of SQ18 showing 50% probability ellipsoids and the atom-numbering scheme (H atoms were omitted for clarity). Symmetry code;  $a = -2 - x, -1 - y, 1 - z$

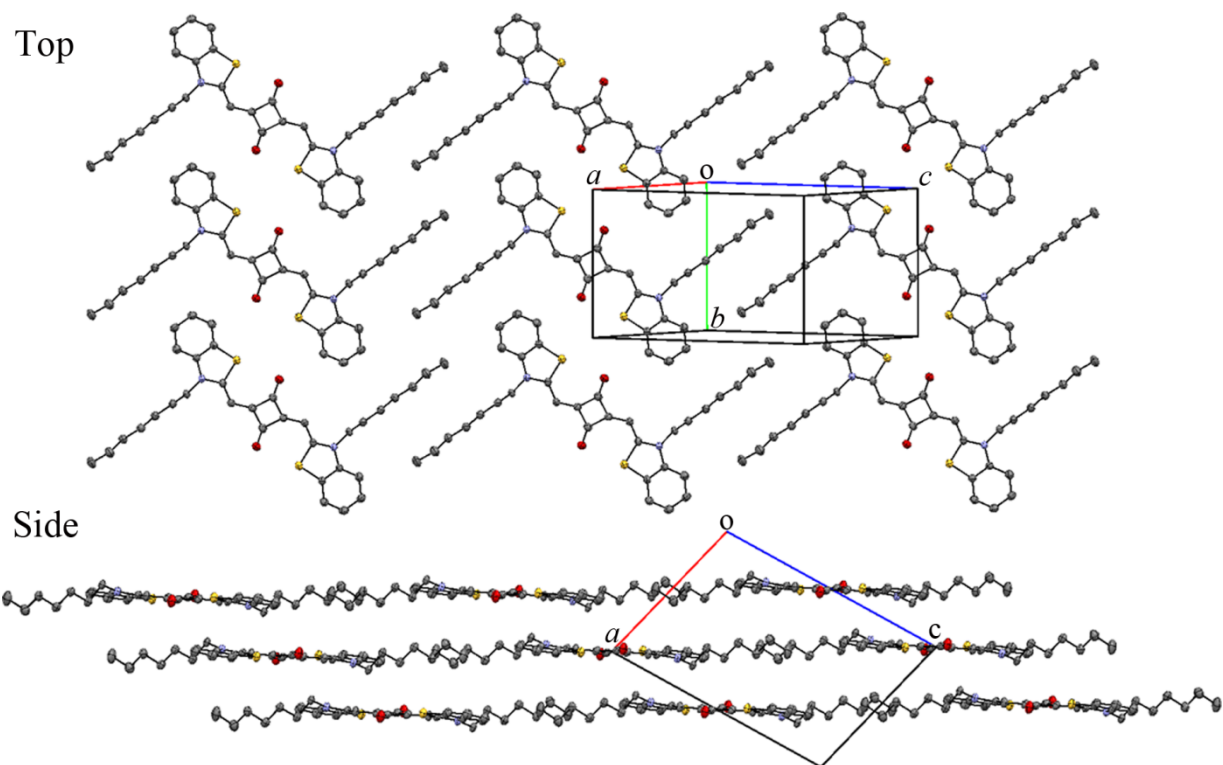

Figure S11. Monolayer and side views of packing structure in SQ07 (type II). The nearest Miller index is (101) for the monolayer. Hydrogen atoms were omitted for clarity.

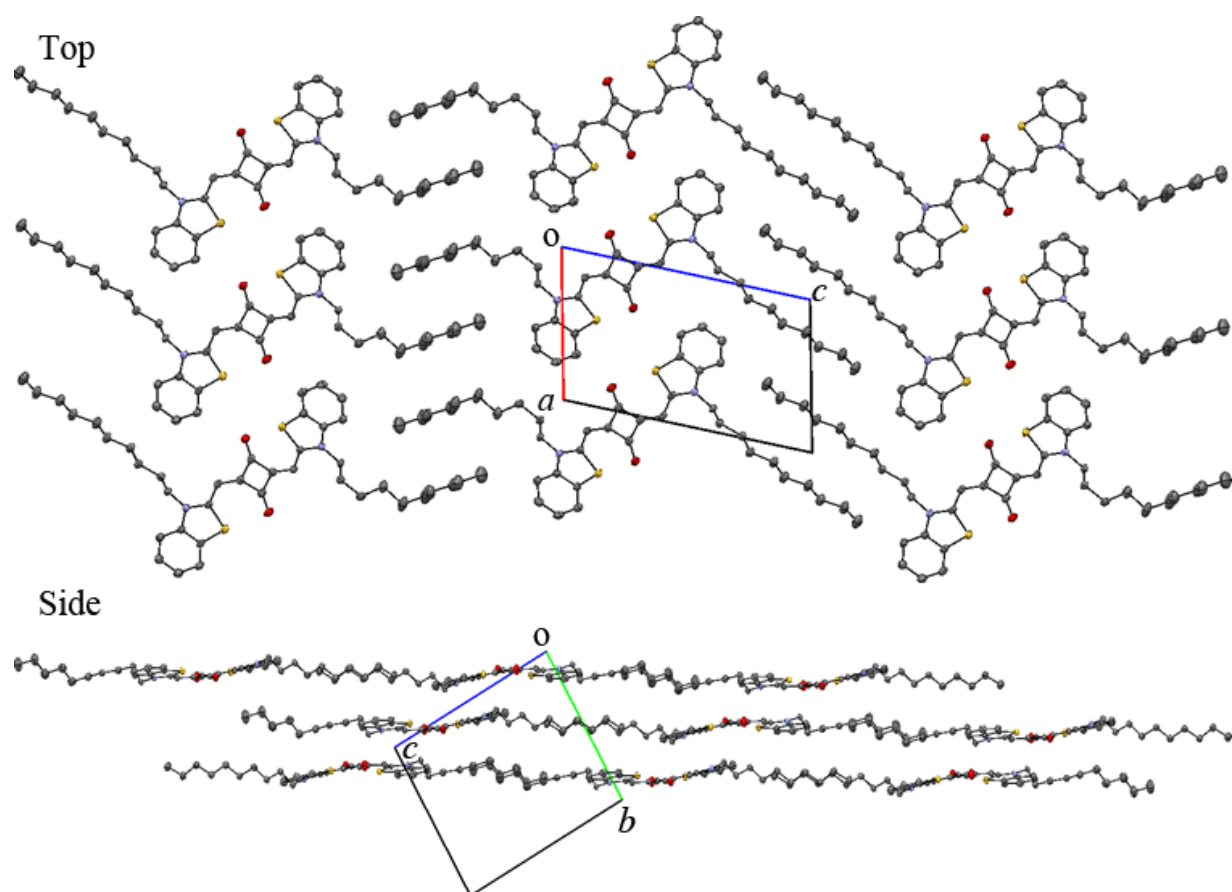

Figure S12. Monolayer and side views of packing structure in SQ10 (type III). The nearest Miller index is (064) for the monolayer. Hydrogen atoms were omitted for clarity.



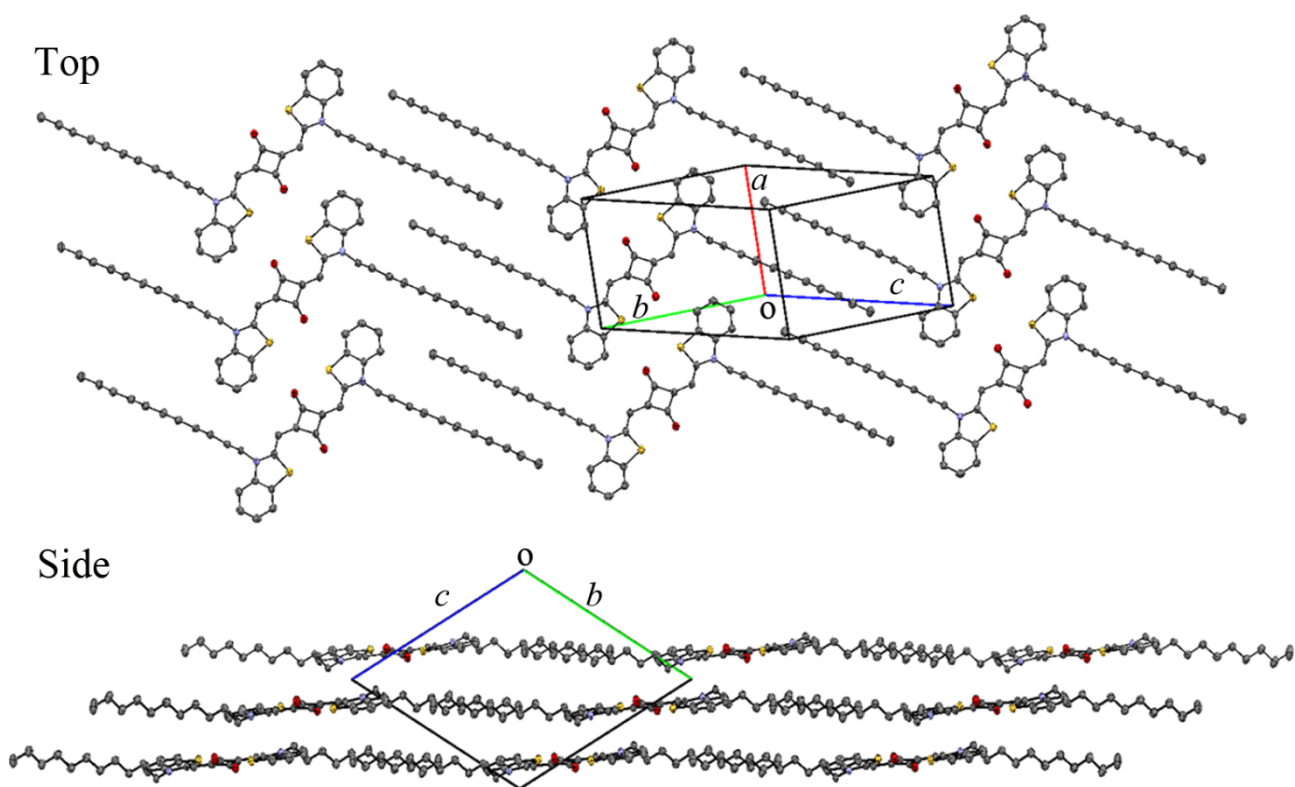

Figure S13. Monolayer and side views of packing structure in SQ11 (type III). The nearest Miller index is (044) for the monolayer. Hydrogen atoms were omitted for clarity.

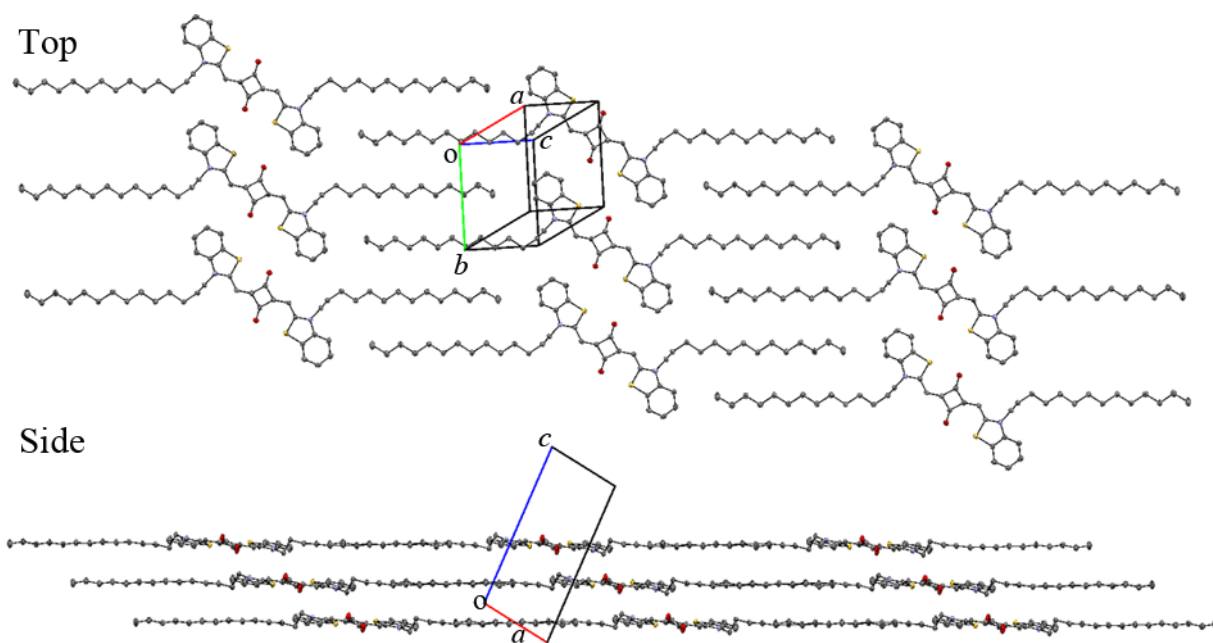

Figure S14. Monolayer and side views of packing structure in SQ14 (type IV). The nearest Miller index is (-208) for the monolayer. Hydrogen atoms were omitted for clarity.

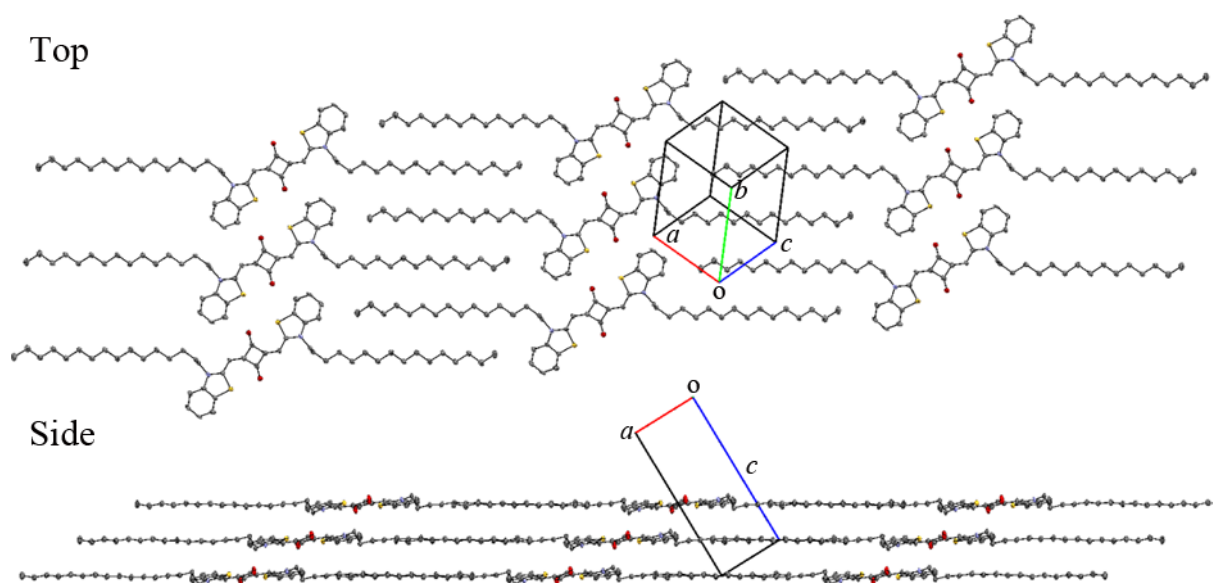

Figure S15. Monolayer and side views of packing structure in SQ16 (type IV). The nearest Miller index is (104) for the monolayer. Hydrogen atoms were omitted for clarity.

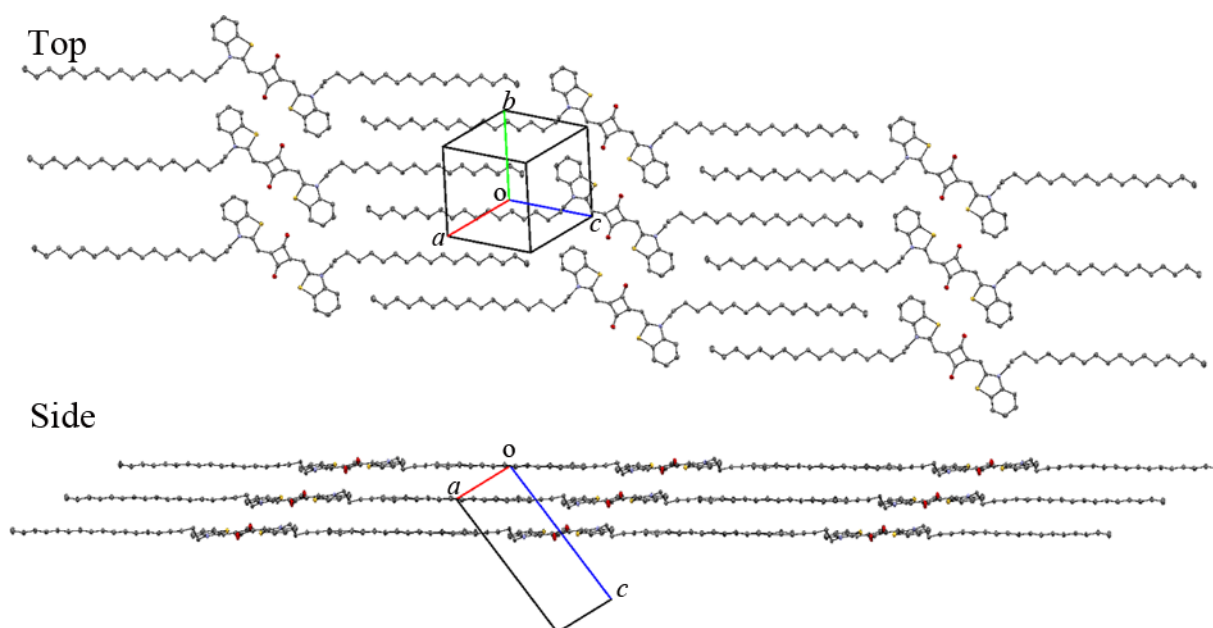

Figure S16. Monolayer and side views of packing structure in SQ18 (type IV). The nearest Miller index is (104) for the monolayer. Hydrogen atoms were omitted for clarity.

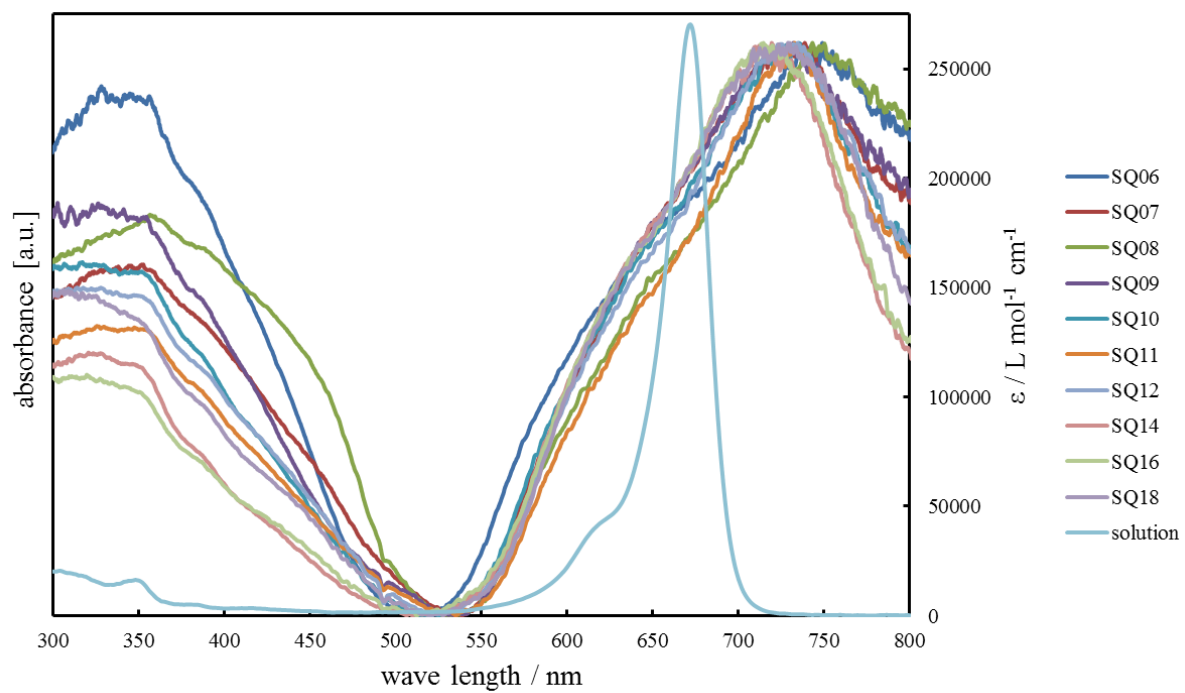

Figure S17. Optical waveguide spectra of all single crystals and UV-Vis absorption spectra of CH<sub>2</sub>Cl<sub>2</sub> solution.

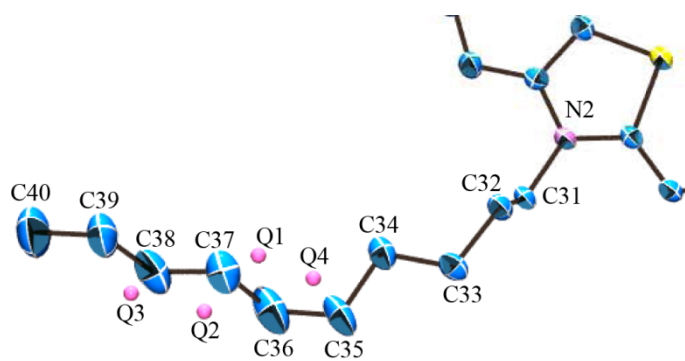

Figure S18. ORTEP view of the C31–C40 alkyl chain of SQ10 showing 50% probability ellipsoids (H atoms were omitted for clarity). Fourier synthesis peaks Q1–Q4 presented heights of 0.91, 0.82, 0.51 and 0.45  $\text{e}\text{\AA}^{-3}$ , respectively.

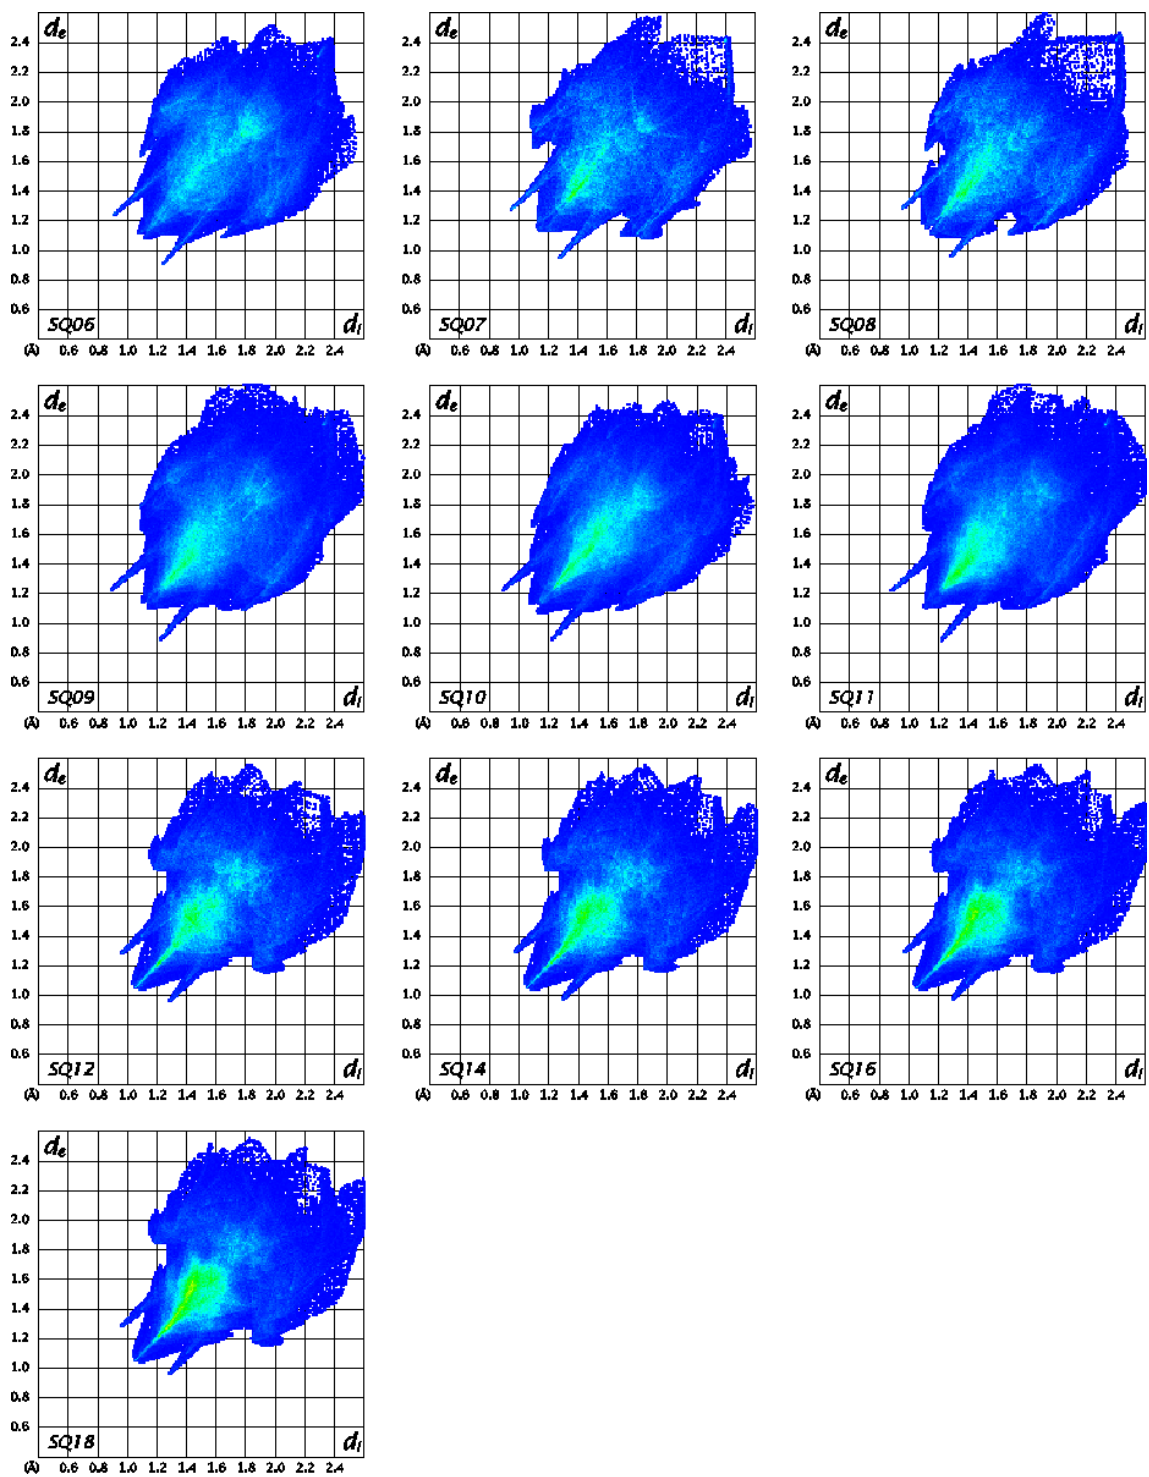

Figure S19. Fingerprint plot in Hirshfeld surface for SQ06-12, 14, 16, 18

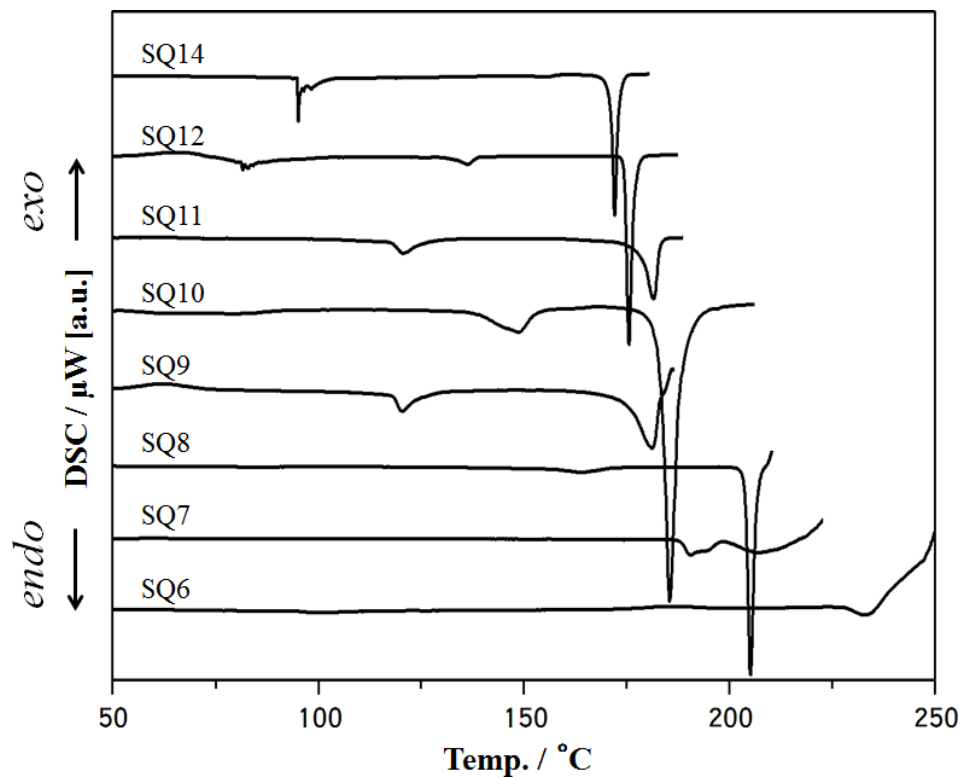

Figure S20. DSC curves of various squarylium dyes obtained for virgin samples.

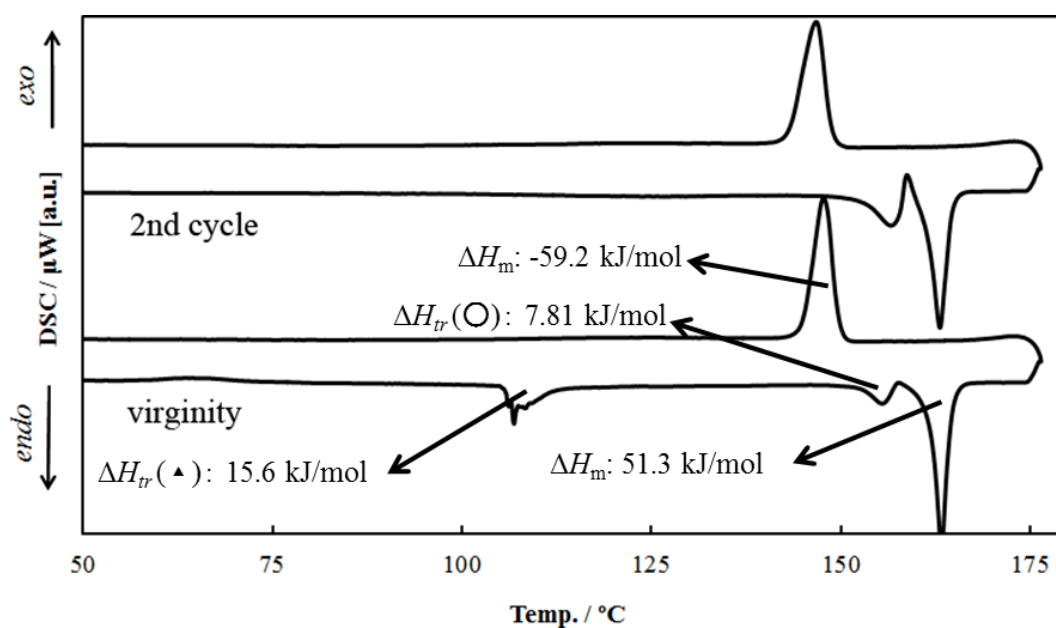

Figure S21. DSC curves of SQ16. Arrows indicate the enthalpies of each transition.

Table S1. Selected geometry parameters of the hydrogen bond and the S...O interaction

| Compound | D-H...A       | D...A /Å   | DHA /° | S...O    | S...O /Å |
|----------|---------------|------------|--------|----------|----------|
| SQ06     | C5-H5...O1a   | 3.203(3)   | 166.4  | S1...O2  | 3.0348   |
|          | C21-H21...O2b | 3.179(3)   | 134.7  | S2...O1  | 2.9458   |
| SQ07     | C5-H5...O1b   | 3.282(4)   | 165.4  | S1...O1a | 2.9895   |
| SQ08     | C5-H5...O1b   | 3.2733(19) | 159.1  | S1...O1a | 2.9951   |
| SQ09     | C5-H5...O1a   | 3.169(4)   | 168.8  | S1...O2  | 2.9993   |
|          | C24-H24...O2b | 3.164(4)   | 150.7  | S2...O1  | 3.0454   |
| SQ10     | C5-H5...O1a   | 3.179(3)   | 166.3  | S1...O2  | 2.9866   |
|          | C25-H25...O2b | 3.142(3)   | 144.0  | S2...O1  | 2.9714   |
| SQ11     | C5-H5...O1a   | 3.145(3)   | 153.1  | S1...O2  | 3.0412   |
|          | C26-H26...O2b | 3.168(3)   | 169.8  | S2...O1  | 3.0001   |
| SQ12     | C5-H5...O1b   | 3.199(3)   | 147.4  | S1...O1a | 2.9583   |
| SQ14     | C5-H5...O1b   | 3.199(3)   | 146.6  | S1...O1a | 2.9586   |
| SQ16     | C5-H5...O1b   | 3.202(7)   | 147.0  | S1...O1  | 2.9708   |
| SQ18     | C5-H5...O1b   | 3.197(4)   | 147.9  | S1...O1a | 2.9607   |

Symmetry codes: SQ06:  $a = -1 + x, y, z$ ,  $b = 1 + x, y, z$ , SQ07:  $a = 2 - x, 1 - y, -z$ ,  $b = x, 1 + y, z$ . SQ09:  $a = 1 + x, y, z$ ,  $b = -1 + x, y, z$ , SQ10:  $a = -1 + x, y, z$ ,  $b = 1 + x, y, z$ , SQ11:  $a = -1 + x, y, z$ ,  $b = 1 + x, y, z$ , SQ12:  $a = -1 - x, 3 - y, -z$ ,  $b = x, -1 + y, z$ , SQ14:  $a = 3 - x, 3 - y, 1 - z$ ,  $b = x, -1 + y, z$ , SQ16:  $b = 4 - x, -y, 1 - z$ , SQ18:  $a = -2 - x, -1 - y, 1 - z$ ,  $b = x, 1 + y, z$

Least-squares planes calculated by SHELX-97

Least-squares planes ( $x$ ,  $y$ ,  $z$  in crystal coordinates) and maximum deviations from them in 26 atoms of the  $\pi$ -conjugated moiety are shown below. (Symmetry codes are the same about the atom-numbering scheme)

SQ06

$$1.1794 (31) x + 8.8970 (31) y - 4.8828 (61) z = 1.4498 (76): 0.8738 \text{ \AA} (\text{O1})$$

SQ07

$$8.2883 (35) x + 0.4304 (37) y + 6.1705 (59) z = 8.5035 (49): \pm 0.3284 \text{ \AA} (\text{O1 and O1a})$$

SQ08

$$8.4515 (21) x + 0.4968 (24) y + 6.0686 (41) z = 8.4515 (21): \pm 0.1980 \text{ \AA} (\text{O1 and O1a})$$

SQ09

$$0.5462 (31) x + 9.1532 (28) y + 5.9263 (58) z = 6.6028 (29): -0.6869 \text{ \AA} (\text{O1})$$

SQ10

$$-0.8272 (27) x + 12.3752 (10) y + 5.3399 (51) z = 1.2705 (15): -0.7937 \text{ \AA} (\text{O1})$$

SQ11

$$0.5297 (29) x + 9.7063 (45) y + 5.9778 (56) z = 11.4639 (49): -0.6702 \text{ \AA} (\text{O2})$$

SQ12

$$-2.1152 (34) x + 1.2639 (31) y + 13.0732 (32) z = 2.9534 (30): \pm 0.0552 \text{ \AA} (\text{O1 and O1a})$$

SQ14

$$-2.1031 (37) x - 1.2862 (34) y + 15.7572 (17) z = 2.7946 (21): \pm 0.0509 \text{ \AA} (\text{O1 and O1a})$$

SQ16

$$2.1096 (99) x - 1.2939 (89) y + 16.2559 (66) z = 12.9941 (139): \pm 0.0584 \text{ \AA} (\text{O1 and O1a})$$

SQ18

$$2.1230 (52) x + 1.2678 (47) y + 16.6361 (41) z = 5.5611 (48): \pm 0.0477 \text{ \AA} (\text{O1 and O1a})$$
